# Supplementary material for: Maneuverability of the Scope and Instruments within Three Different Single-Incision Laparoscopic Ports: An Experimental Pilot Study
Source: MDPI journal article supplement (doi:10.3390/ani11051242), 2021-04-26
Supplement: s1 [file s1]

Table S1 - AREA

| mm <sup>2</sup>                            | AREA       | AREA (theoretical) |
|--------------------------------------------|------------|--------------------|
| Sil_1ENDO_0Werkzeug_Volumen1.trc           | 9,8817E+04 | 1,9349E+04         |
| Sil_1ENDO_0Werkzeug_Volumen2.trc           | 1,0092E+05 | 1,8880E+04         |
| Sil_1ENDO_0Werkzeug_Volumen3.trc           | 8,9092E+04 | 1,7717E+04         |
| Sil_1ENDO_0Werkzeug_Volumen4.trc           | 1,0393E+05 | 2,1626E+04         |
| Sil_1ENDO_0Werkzeug_Volumen5.trc           | 1,0279E+05 | 1,9532E+04         |
| Sil_1ENDO_0Werkzeug_Volumen6.trc           | 1,1082E+05 | 2,2206E+04         |
| Sil_1ENDO_1Werkzeug_Volumen1.trc           | 7,6476E+04 | 1,5976E+04         |
| Sil_1ENDO_1Werkzeug_Volumen2.trc           | 8,6354E+04 | 1,6423E+04         |
| Sil_1ENDO_1Werkzeug_Volumen3.trc           | 9,0168E+04 | 1,6584E+04         |
| Sil_1ENDO_1Werkzeug_Volumen4.trc           | 7,3818E+04 | 1,5757E+04         |
| Sil_1ENDO_1Werkzeug_Volumen5.trc           | 9,1606E+04 | 1,8768E+04         |
| Sil_1ENDO_1Werkzeug_Volumen6.trc           | 1,0198E+05 | 1,9027E+04         |
| Handschuh_1ENDO_0Werkzeug_Volumen1.trc     | 1,2938E+05 | 2,6623E+04         |
| Handschuh_1ENDO_0Werkzeug_Volumen2.trc     | 1,5056E+05 | 3,2901E+04         |
| Handschuh_1ENDO_0Werkzeug_Volumen3.trc     | 1,6547E+05 | 3,7958E+04         |
| Handschuh_1ENDO_0Werkzeug_Volumen4.trc     | 1,7133E+05 | 3,6074E+04         |
| Handschuh_1ENDO_0Werkzeug_Volumen5.trc     | 1,6331E+05 | 3,3639E+04         |
| Handschuh_1ENDO_0Werkzeug_Volumen6.trc     | 1,4759E+05 | 3,2435E+04         |
| Handschuh_1ENDO_1Werkzeug_Volumen1.trc     | 1,6321E+05 | 4,0691E+04         |
| Handschuh_1ENDO_1Werkzeug_Volumen2.trc     | 2,1855E+05 | 4,8895E+04         |
| Handschuh_1ENDO_1Werkzeug_Volumen3.trc     | 2,2527E+05 | 4,6659E+04         |
| Handschuh_1ENDO_1Werkzeug_Volumen4.trc     | 2,2895E+05 | 4,6172E+04         |
| Handschuh_1ENDO_1Werkzeug_Volumen5.trc     | 2,3042E+05 | 5,1532E+04         |
| Handschuh_1ENDO_1Werkzeug_Volumen6.trc     | 2,3028E+05 | 5,0036E+04         |
| 'ENDO_1ENDO_0Werkzeug_Volumen1.trc'        | 1,7112E+04 | 4,4374E+03         |
| 'ENDO_1ENDO_0Werkzeug_Volumen2.trc'        | 1,9309E+04 | 6,0771E+03         |
| 'ENDO_1ENDO_0Werkzeug_Volumen3.trc'        | 1,8315E+04 | 4,6907E+03         |
| 'ENDO_1ENDO_0Werkzeug_Volumen4.trc'        | 2,2240E+04 | 6,1683E+03         |
| 'ENDO_1ENDO_0Werkzeug_Volumen5.trc'        | 2,0334E+04 | 4,9348E+03         |
| 'ENDO_1ENDO_0Werkzeug_Volumen6.trc'        | 2,3321E+04 | 6,6813E+03         |
| 'ENDO_1ENDO_1Werkzeug_links_Volumen1.trc'  | 1,0875E+04 | 4,5012E+03         |
| 'ENDO_1ENDO_1Werkzeug_links_Volumen2.trc'  | 9,3906E+03 | 2,8002E+03         |
| 'ENDO_1ENDO_1Werkzeug_links_Volumen3.trc'  | 8,6045E+03 | 1,9831E+03         |
| 'ENDO_1ENDO_1Werkzeug_links_Volumen4.trc'  | 9,3207E+03 | 2,5254E+03         |
| 'ENDO_1ENDO_1Werkzeug_links_Volumen5.trc'  | 8,4367E+03 | 2,9658E+03         |
| 'ENDO_1ENDO_1Werkzeug_links_Volumen6.trc'  | 8,8453E+03 | 3,0389E+03         |
| 'ENDO_1ENDO_1Werkzeug_mitte_Volumen1.trc'  | 1,0976E+04 | 2,8818E+03         |
| 'ENDO_1ENDO_1Werkzeug_mitte_Volumen2.trc'  | 7,6156E+03 | 2,7920E+03         |
| 'ENDO_1ENDO_1Werkzeug_mitte_Volumen3.trc'  | 8,6923E+03 | 2,4690E+03         |
| 'ENDO_1ENDO_1Werkzeug_mitte_Volumen4.trc'  | 9,7879E+03 | 2,3212E+03         |
| 'ENDO_1ENDO_1Werkzeug_mitte_Volumen5.trc'  | 9,1007E+03 | 3,2894E+03         |
| 'ENDO_1ENDO_1Werkzeug_mitte_Volumen6.trc'  | 6,4189E+03 | 2,0823E+03         |
| 'ENDO_1ENDO_1Werkzeug_rechts_Volumen1.trc' | 8,0837E+03 | 5,9467E+14         |
| 'ENDO_1ENDO_1Werkzeug_rechts_Volumen2.trc' | 6,0273E+03 | 4,6289E+03         |
| 'ENDO_1ENDO_1Werkzeug_rechts_Volumen3.trc' | 6,3307E+03 | 3,1245E+03         |
| 'ENDO_1ENDO_1Werkzeug_rechts_Volumen4.trc' | 7,2072E+03 | 4,4502E+03         |
| 'ENDO_1ENDO_1Werkzeug_rechts_Volumen5.trc' | 7,9330E+03 | 4,9381E+03         |
| 'ENDO_1ENDO_1Werkzeug_rechts_Volumen6.trc' | 6,5670E+03 | 5,2657E+03         |

Table S2 - VOLUME

| mm <sup>3</sup>                         | Volume    | Volume(theoretical) |
|-----------------------------------------|-----------|---------------------|
| Sil_1ENDO_0Werkzeug_Volumen1.trc        | 8,428E+06 | 1,238E+07           |
| Sil_1ENDO_0Werkzeug_Volumen2.trc        | 9,263E+06 | 1,373E+07           |
| Sil_1ENDO_0Werkzeug_Volumen3.trc        | 8,060E+06 | 1,242E+07           |
| Sil_1ENDO_0Werkzeug_Volumen4.trc        | 9,197E+06 | 3,972E+09           |
| Sil_1ENDO_0Werkzeug_Volumen5.trc        | 8,284E+06 | 1,200E+07           |
| Sil_1ENDO_0Werkzeug_Volumen6.trc        | 9,196E+06 | 1,297E+07           |
| Sil_1ENDO_1Werkzeug_Volumen1.trc        | 1,010E+07 | 1,777E+07           |
| Sil_1ENDO_1Werkzeug_Volumen2.trc        | 1,161E+07 | 1,865E+07           |
| Sil_1ENDO_1Werkzeug_Volumen3.trc        | 1,166E+07 | 1,785E+07           |
| Sil_1ENDO_1Werkzeug_Volumen4.trc        | 9,698E+06 | 1,664E+07           |
| Sil_1ENDO_1Werkzeug_Volumen5.trc        | 1,261E+07 | 1,876E+07           |
| Sil_1ENDO_1Werkzeug_Volumen6.trc        | 1,567E+07 | 2,165E+07           |
| ENDO_1ENDO_0Werkzeug_Volumen1.trc       | 1,247E+06 | 3,316E+06           |
| ENDO_1ENDO_0Werkzeug_Volumen2.trc       | 1,111E+06 | 3,917E+06           |
| ENDO_1ENDO_0Werkzeug_Volumen3.trc       | 1,642E+06 | 3,996E+09           |
| ENDO_1ENDO_0Werkzeug_Volumen4.trc       | 1,282E+06 | 3,512E+06           |
| ENDO_1ENDO_0Werkzeug_Volumen5.trc       | 1,202E+06 | 2,325E+06           |
| ENDO_1ENDO_0Werkzeug_Volumen6.trc       | 1,541E+06 | 4,530E+06           |
| ENDO_1ENDO_1Werkzeug_links_Volumen1.trc | 1,087E+06 | 3,841E+06           |
| ENDO_1ENDO_1Werkzeug_links_Volumen2.trc | 1,027E+06 | 4,529E+06           |
| ENDO_1ENDO_1Werkzeug_links_Volumen3.trc | 9,955E+05 | 3,521E+06           |
| ENDO_1ENDO_1Werkzeug_links_Volumen4.trc | 1,016E+06 | 3,678E+06           |
| ENDO_1ENDO_1Werkzeug_links_Volumen5.trc | 9,308E+05 | 3,668E+06           |
| ENDO_1ENDO_1Werkzeug_links_Volumen6.trc | 9,520E+05 | 2,771E+06           |

Table S3 - ANGLES

| w/o Instrument | X-links | X-rechts | Y-links | Y-rechts |
|----------------|---------|----------|---------|----------|
| Endo1          | 15,0    | 16,0     | 21,0    | 23,0     |
| Endo3          | 22,0    | 22,0     | 21,0    | 22,0     |
| Endo4          | 21,0    | 27,0     | 25,0    | 25,0     |
| Endo5          | 22,0    | 25,0     | 24,0    | 24,0     |
| Endo6          | 23,0    | 26,0     | 25,0    | 25,0     |
| SILS1          | 57,0    | 55,0     | 61,0    | 61,0     |
| SILS2          | 53,0    | 54,0     | 56,0    | 57,0     |
| SILS3          | 52,0    | 53,0     | 52,0    | 52,0     |
| SILS4          | 59,0    | 61,0     | 56,0    | 56,0     |
| SILS5          | 61,0    | 61,0     | 56,0    | 57,0     |
| SILS6          | 63,0    | 61,0     | 59,0    | 59,0     |
| Handschuh1     | 63,0    | 64,0     | 53,0    | 51,0     |
| Handschuh2     | 68,0    | 66,0     | 63,0    | 63,0     |
| Handschuh3     | 63,0    | 64,0     | 66,0    | 70,0     |
| Handschuh4     | 63,0    | 66,0     | 69,0    | 74,0     |
| Handschuh5     | 68,0    | 66,0     | 69,0    | 72,0     |
| Handschuh6     | 67,0    | 70,0     | 66,0    | 72,0     |
